# Supplementary material for: Crosslinking activity of non-muscle myosin II is not sufficient for embryonic cytokinesis in C. elegans
Source: Oxford University Press journal article supplement (doi:10.1242/dev.179150), 2019-01-01
Supplement: dev179150supp.pdf [file dev179150supp.pdf]

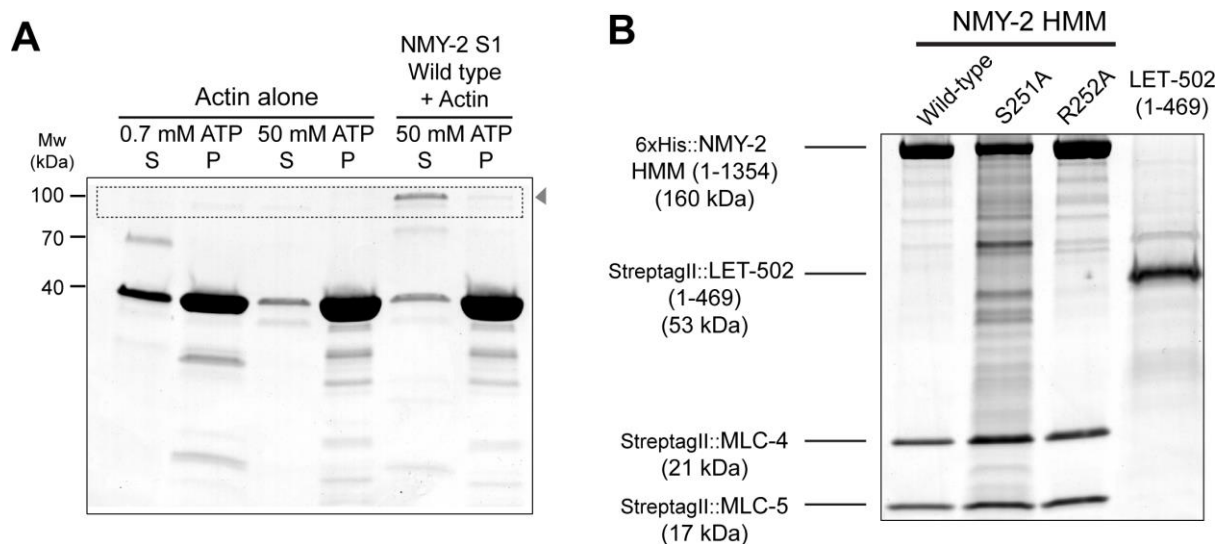

**Figure S2. F-actin samples used in high-speed co-sedimentation assays and NMY-2<sup>HMM</sup> and LET-502(1-469) used for motility assays.**

**(A)** Coomassie-stained SDS-PAGE gel of high-speed F-actin co-sedimentation in the absence of myosin showing supernatant and pellet fractions I in the presence of 0.7 mM ATP (lanes 1 and 2) and after resuspension with 50 mM ATP (lanes 3 and 4), or in the presence of wild-type NMY-2 and resuspended in 50 mM ATP. **(B)** Coomassie-stained SDS-PAGE gel of purified NMY-2(1-1354) HMM fragments in complex with MLC-4 and MLC-5 (lanes 1-3), and purified LET-502(1-469).

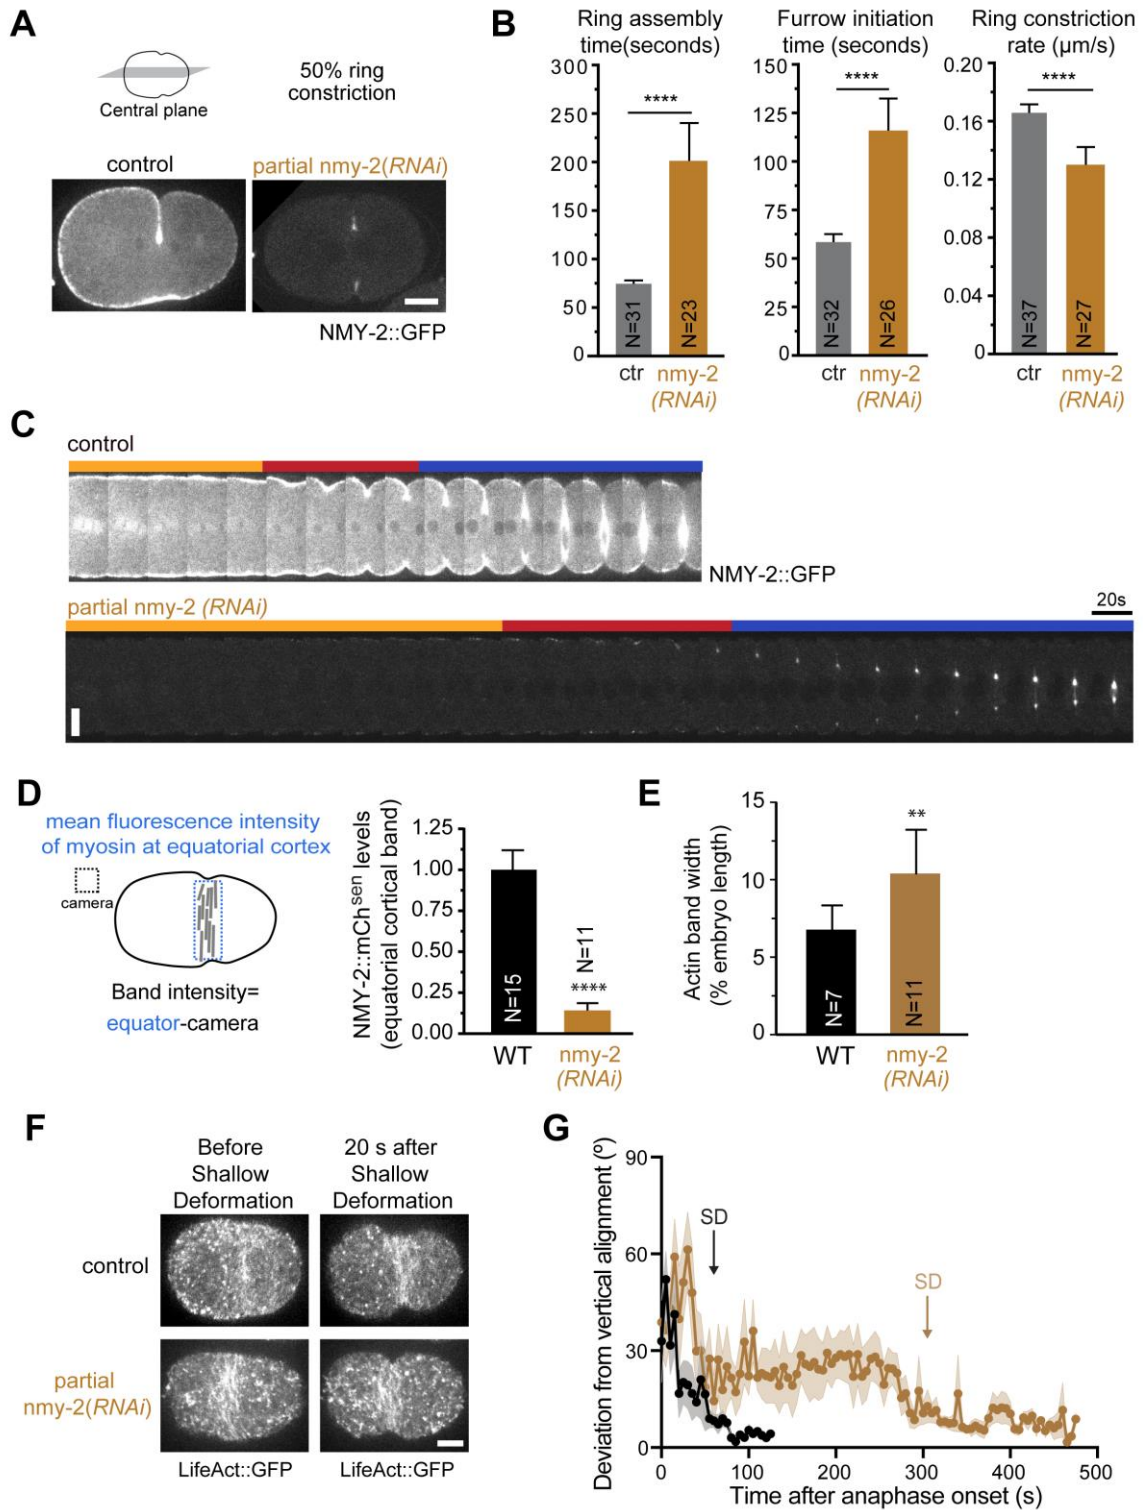

**Figure S3. Partial depletion of NMY-2 in wild-type embryos allows cytokinesis to complete, albeit more slowly than in controls**

**(A)** Central plane at 50 % furrow ingression of a control embryo and an embryo partially depleted of NMY-2 expressing NMY-2::GFP. **(B)** Ring assembly and furrow initiation time intervals and rate of ring constriction (mean $\pm$ 95% CI). **(C)** Kymographs of furrow region. Time zero corresponds to anaphase onset. Orange, red and blue bars indicate the intervals of ring assembly, furrow initiation and ring constriction, as depicted in Fig. 4D. **(D)** Quantification of mean NMY-2::mCherry<sup>sen</sup> levels at the equatorial cortex, measured as indicated on the left. Note that *nmy-2(RNAi)* depletes both endogenous NMY-2 and transgene-encoded NMY-2::mCherry<sup>sen</sup>. N is the number of embryos analyzed. **(E)** Equatorial actin band width normalized to embryo length at shallow deformation. **(F)** Stills of one-cell embryos expressing LifeAct::GFP before and after equatorial shallow deformation. **(G)** Deviation from vertical alignment of F-actin bundles (mean $\pm$ SEM), measured between anaphase onset and back-to-back membrane configuration. Average onset of equatorial shallow deformation (SD) is indicated. Statistical significance was determined using the t-test; \*\*\*\* P $\leq$ 0.0001, \*\* P $\leq$ 0.01. Scale bars, 10  $\mu$ m.

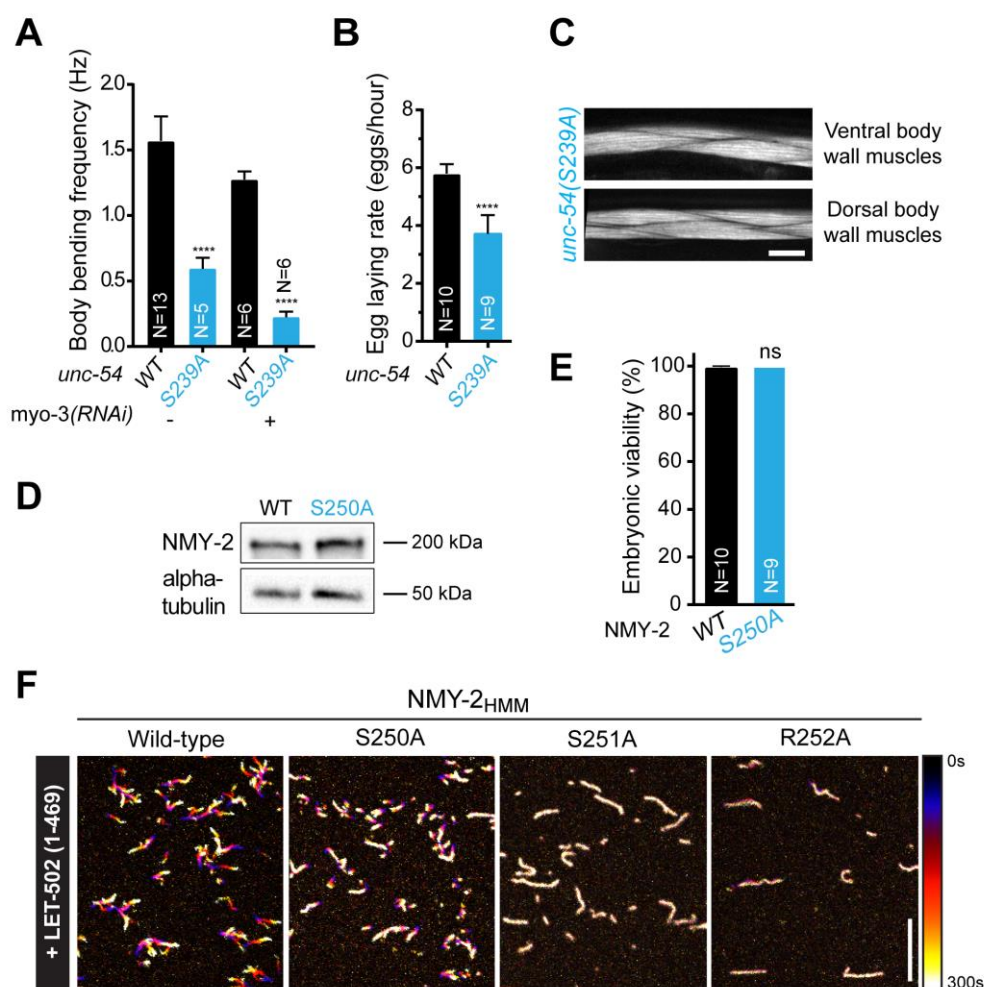

**Figure S4. Additional characterization of NMY-2(S250A) and UNC-54(S239A) mutants**

**(A)** Body bend frequency in liquid (mean $\pm$ 95% CI) in wild-type and *unc-54(S239A)* animals with and without depletion of MYO-3. **(B)** Egg laying rate (mean $\pm$ 95% CI) in wild-type and *unc-54(S239A)* animals. **(C)** Phalloidin staining of body wall muscles in *unc-54(S239A)* animals. **(D)** Immunoblot showing NMY-2 levels in wild-type and *nmy-2(S250A)* animals.  $\alpha$ -tubulin is used as loading control. **(E)** Embryonic viability (mean $\pm$ 95% CI) in wild-type or *nmy-2(S250A)* animals. **(F)** Time projections of movies of F-actin sliding in the presence of wild-type, S250A, S251A or R252A NMY-2 HMMs after phosphorylation by LET-502(1-469). Color coding was used from black (0s) to white (300s). N is the number of animals analyzed in A and B and the number of animals whose progeny was analyzed in E. Statistical significance was determined using one-way ANOVA followed by Bonferroni's multiple comparison test; \*\*\*\*  $P \leq 0.0001$ , ns=not significant ( $P > 0.05$ ). Scale bars, 10  $\mu$ m.

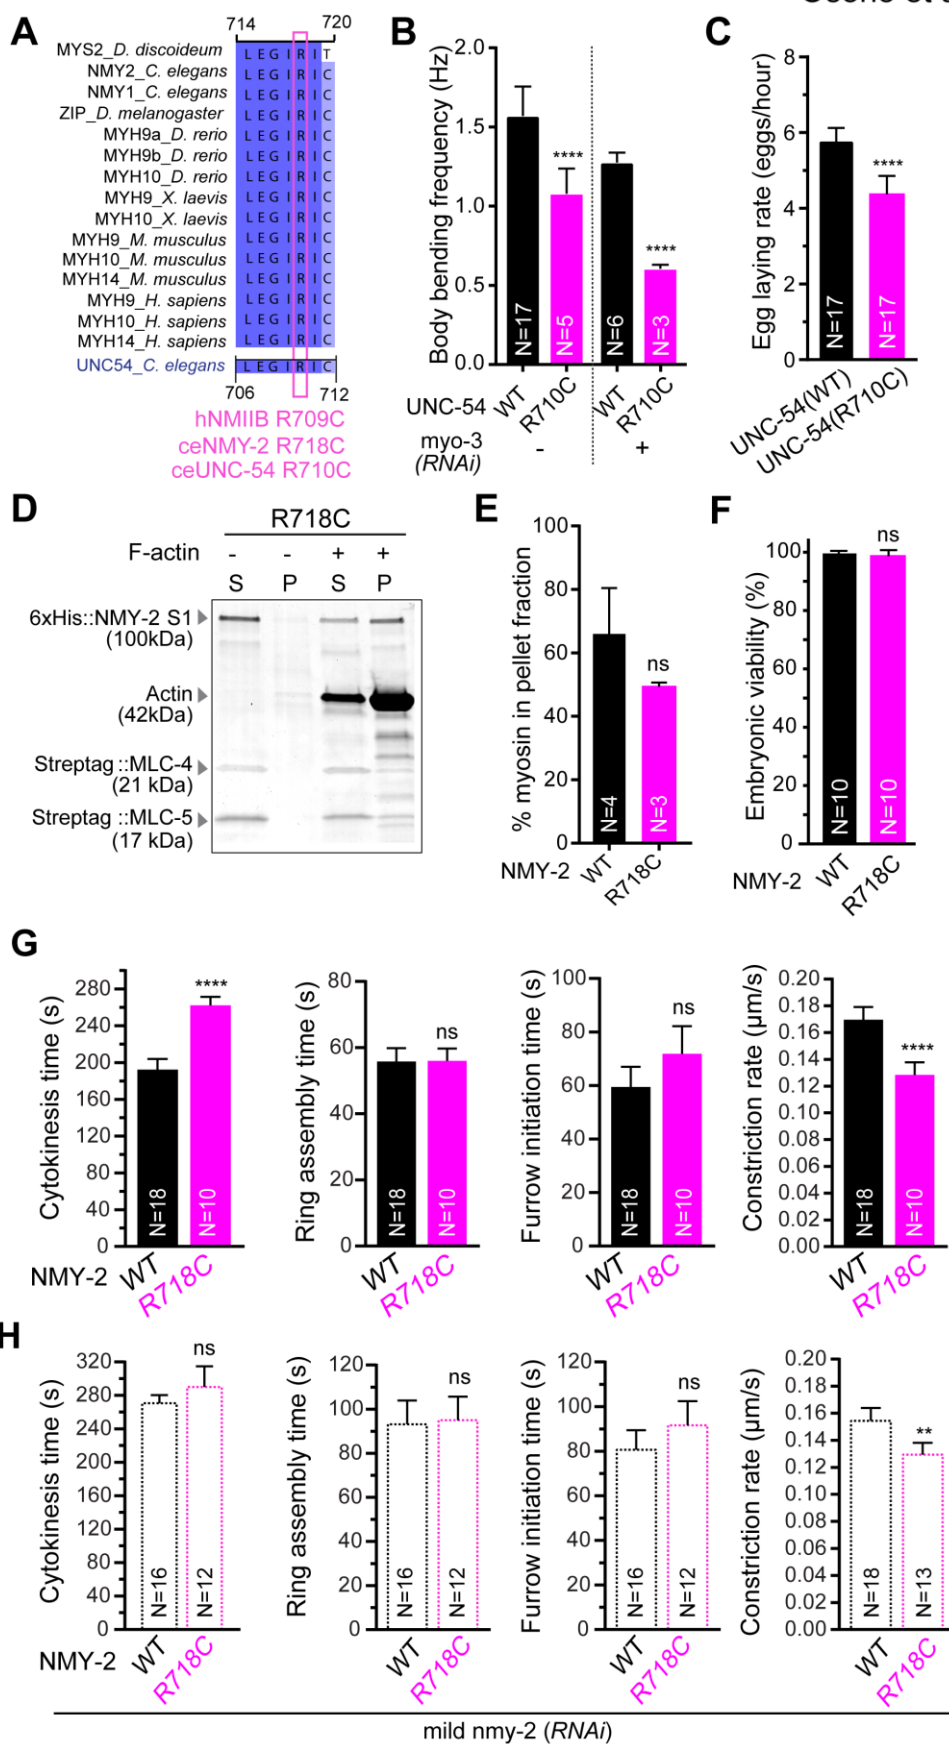

**Figure S5. NMY-2(R718C), which is equivalent to human NMIIB(R709C), is not motor-dead**

**(A)** Alignment of non-muscle myosin IIs of several species along with *C. elegans* muscle myosin heavy chain UNC-54 showing conservation of the SH1 helix region. **(B)** Body bend frequency in liquid (mean±95% CI) in wild-type and *unc-54(R710C)* animals with and without depletion of MYO-3. **(C)** Egg laying rate (mean±95% CI) in wild-type and *unc-54(R710C)* animals. **(D)** Coomassie-stained SDS-PAGE gel of high-speed F-actin co-sedimentation assays in which the NMY-2(R718C)<sub>S1</sub> was incubated with and without 14.7 μM of F-actin before ultracentrifugation. (S) indicates the supernatant and (P) the pellet fractions. **(E)** Percentage (mean±95% CI) of NMY-2<sub>S1</sub> present in the pellet, determined by measuring protein band intensities in Coomassie-stained SDS-PAGE gels as shown in (D). **(F)** Embryonic viability (mean±95% CI) in wild-type or *nmy-2(R718C)* animals. **(G, H)** Cytokinesis, ring assembly and furrow initiation time intervals and rate of ring constriction (mean±95% CI) in wild-type and *nmy-2(R718C)* embryos with and without mild depletion of NMY-2. N is the number of analyzed animals in B and C, the number of animals whose progeny was analyzed in F, the number of independent experiments in E, and the number of analyzed embryos in G and H. Statistical significance was determined using one-way ANOVA followed by Bonferroni's multiple comparison test; \*\*\*\* P≤0.0001, \*\* P≤0.01, ns=not significant (P>0.05).

## Movies

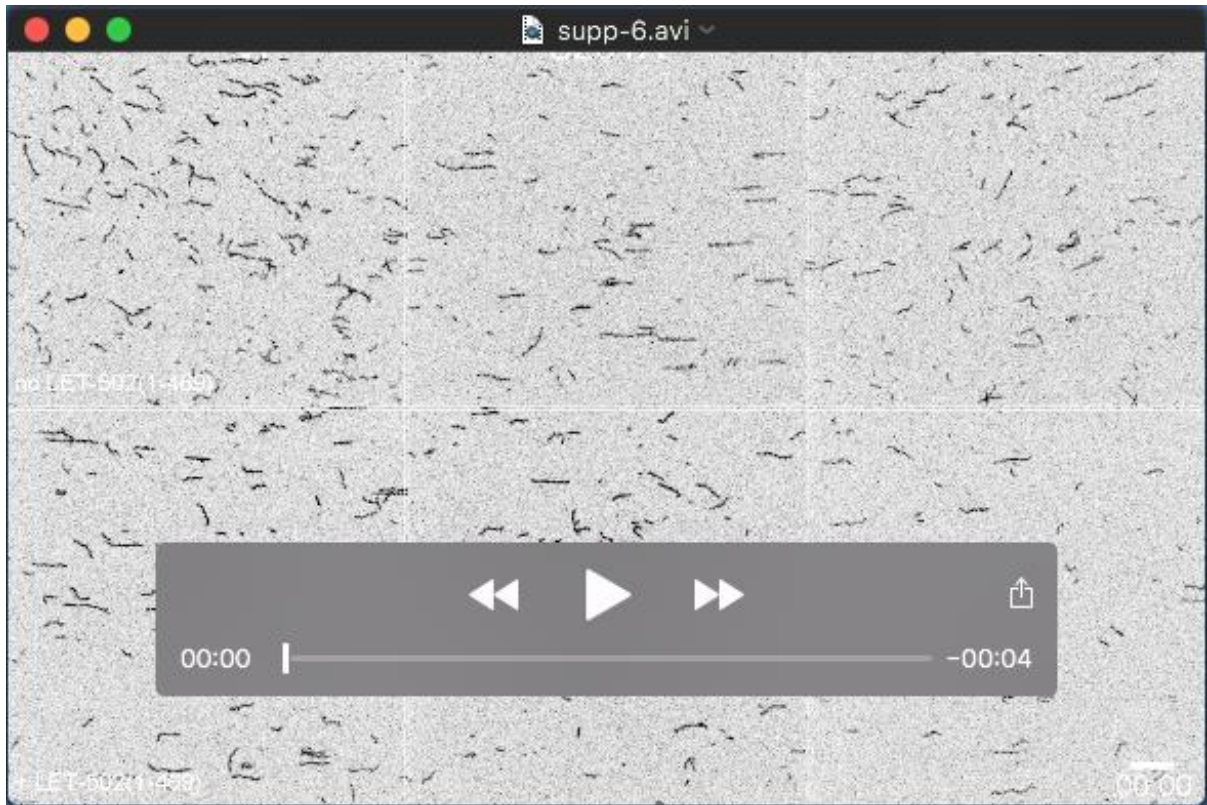

### Movie 1. *In vitro* motility assay of wild-type or mutant NMY-2<sub>HMM</sub> phosphorylated by LET-502(1-469)

Time-lapse images of Rhodamine-phalloidin-labelled F-actin filaments in motility chambers coated with NMY-2(wild-type)<sub>HMM</sub>, NMY-2(S251A)<sub>HMM</sub> or NMY-2(R252A)<sub>HMM</sub> in the absence (top row) or presence of LET-502(1-469). Images were taken every 4 seconds. Frame rate 20 fps, timestamps min:sec. Scale bar, 10  $\mu$ m.



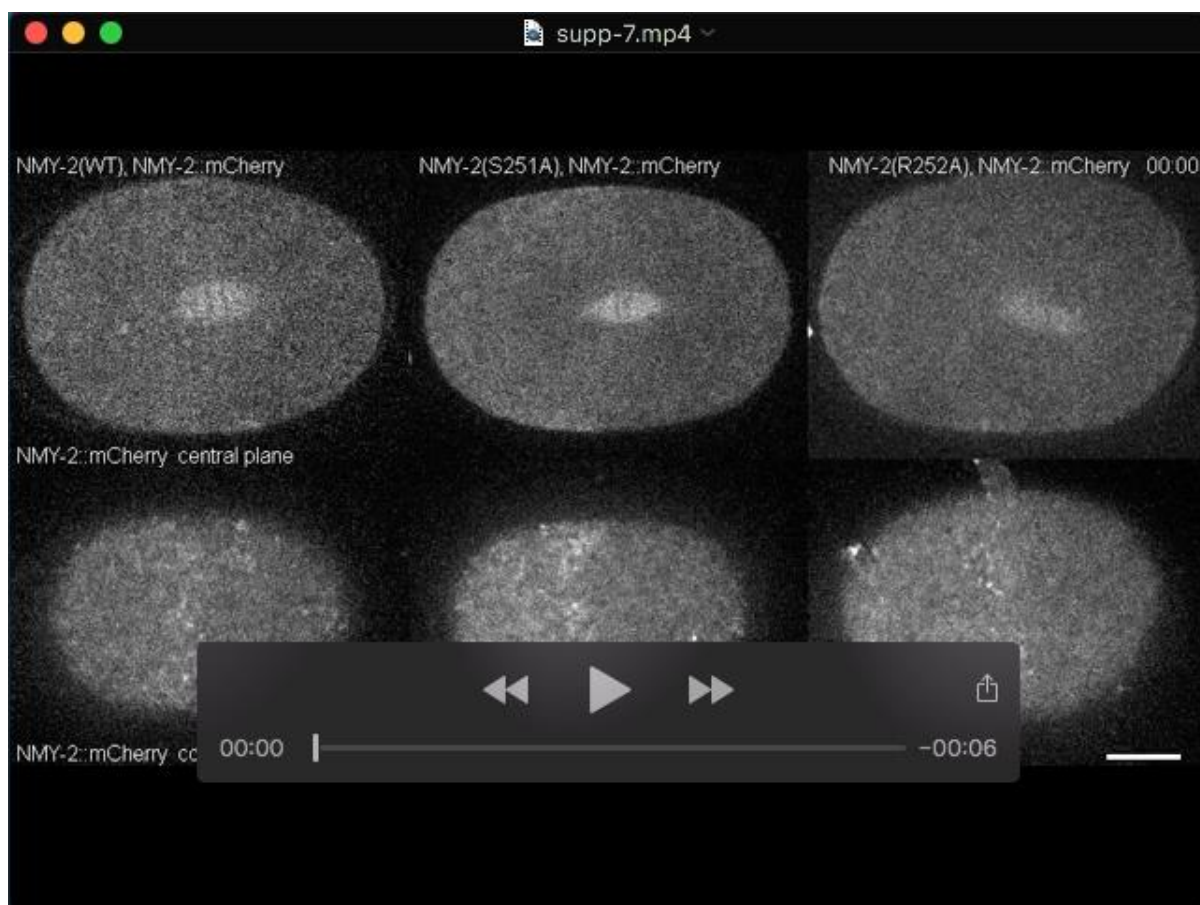

## Movie 2. NMY-2::mCherry<sup>sen</sup> distribution in embryos expressing wild-type or motor-dead myosin

Time-lapse images of the cell cortex (top row) and central plane (bottom row) in dividing one-cell embryos expressing NMY-2::mCherry<sup>sen</sup> together with endogenous unlabelled NMY-2(wild-type), NMY-2(S251A) or NMY-2(R252A). Cortical images on the top row are maximum intensity projections of seven z-sections 0.5  $\mu\text{m}$  apart taken every 5 seconds from anaphase onset (0:00). Frame rate 5 fps, timestamps min:sec. Scale bar, 10  $\mu\text{m}$ .

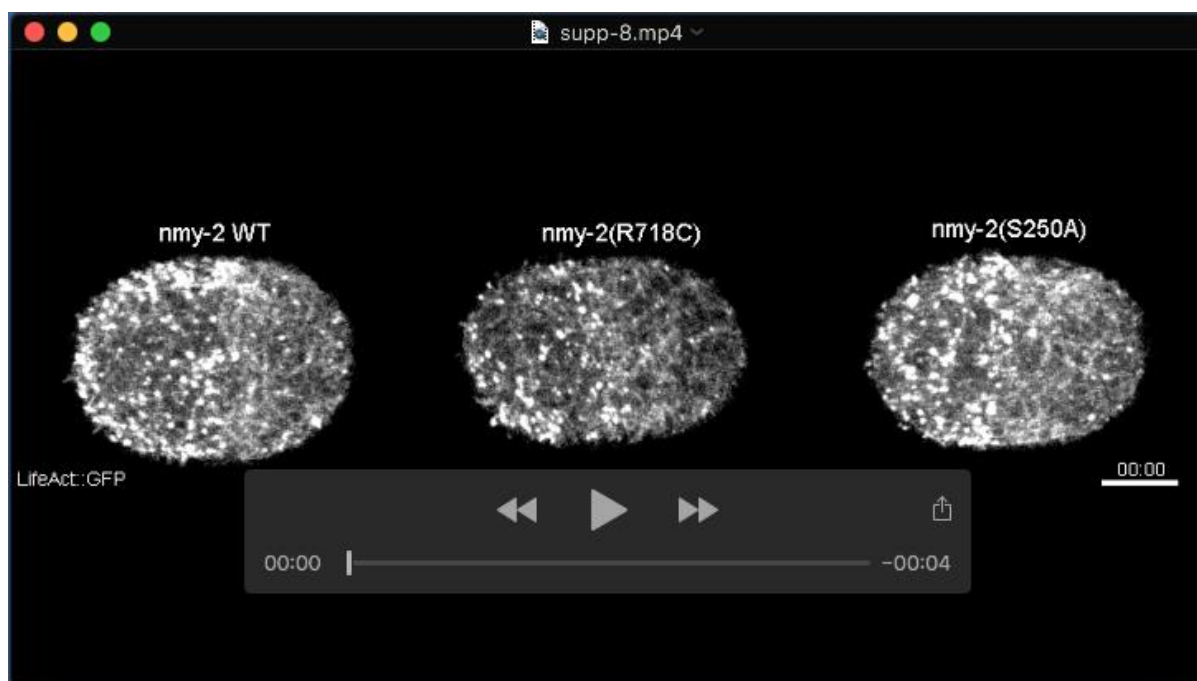

**Movie 3. Cortical actin equatorial band in embryos expressing NMY-2(S250A) and NMY-2(R718C) is similar to that of controls**

Time-lapse images of the cell cortex in dividing wild-type, *nmy-2(S250A)* and *nmy-2(R718C)* embryos one-cell embryos expressing LifeAct::GFP. Images are maximum intensity projections of seven z-sections 0.5  $\mu\text{m}$  apart taken every 5 seconds from anaphase onset (0:00). Frame rate 5 fps, timestamps min:sec. Scale bar, 10  $\mu\text{m}$ .

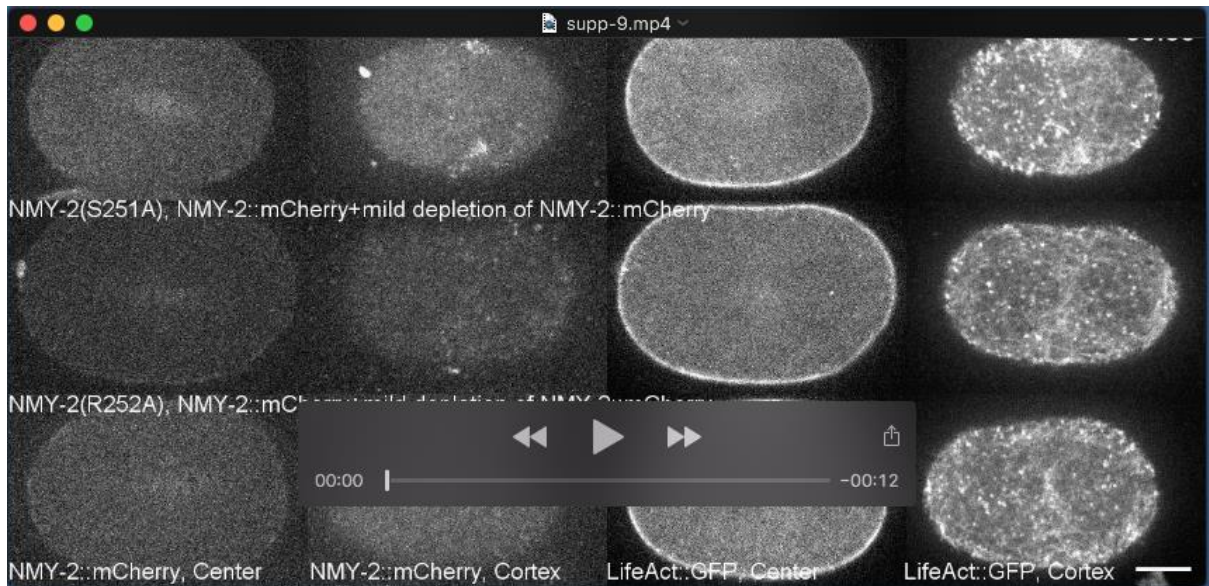

**Movie 4. Excess of motor-dead myosin over wild-type myosin results in enhanced recruitment of NMY-2::mCherry<sup>sen</sup> to the cell equator**

Time-lapse images of the central plane (1st and 3rd columns) and cell cortex (2nd and 4th columns) of dividing one-cell embryos expressing NMY-2::mCherry<sup>sen</sup> (1st and 2nd columns) and LifeAct::GFP (3rd and 4th columns). Conditions are indicated for each row. Cortical images are maximum projections of seven z-sections 0.5  $\mu\text{m}$  apart. First time point corresponds to anaphase onset (0:00) and frames are 5 seconds apart. Frame rate 4 fps, timestamps min:sec. Scale bar, 10  $\mu\text{m}$ .

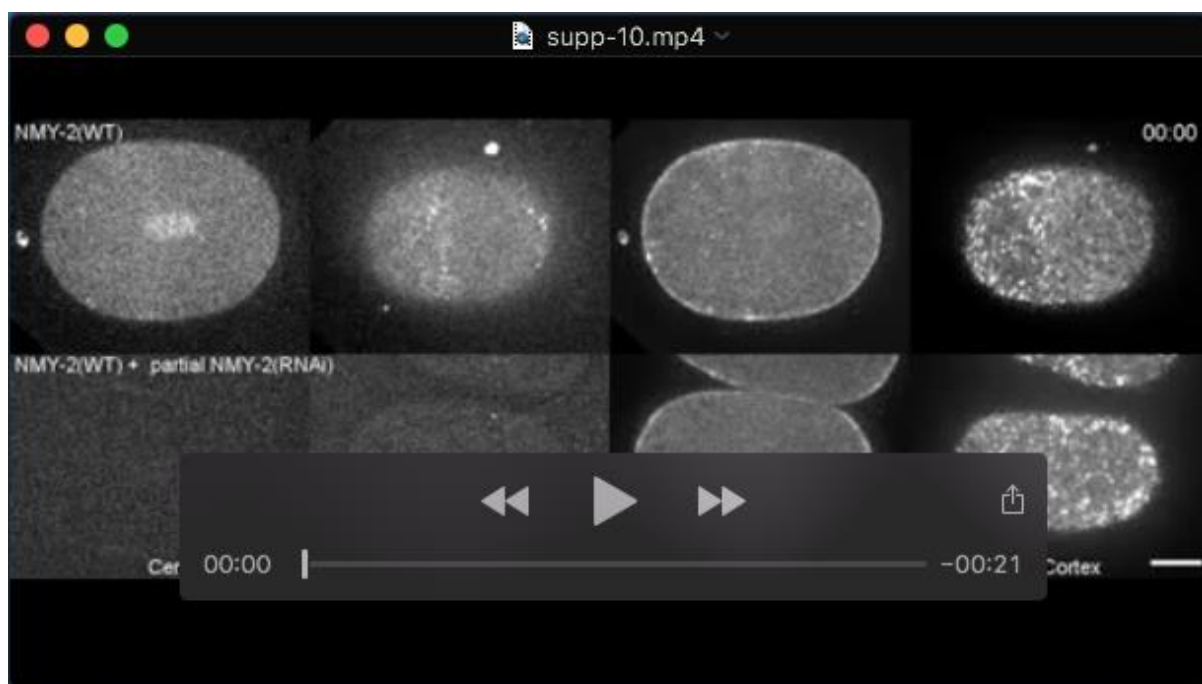

**Movie 5. A minimal amount of myosin is required for equatorial deformation in embryos substantially depleted of NMY-2**

Time-lapse images of the central plane (1st and 3rd columns) and cell cortex (2nd and 4th columns) of dividing one-cell embryos expressing NMY-2::mCherry<sup>sen</sup> (1st and 2nd columns) and LifeAct::GFP (3rd and 4th columns). Conditions are indicated for each row. Cortical images are maximum projections of seven z-sections 0.5  $\mu\text{m}$  apart. First time point corresponds to anaphase onset (0:00) and frames are 5 seconds apart. Frame rate 4 fps, timestamps min:sec. Scale bar, 10  $\mu\text{m}$ .

## Supplemental Tables

Table S1. List of *C. elegans* strains used in this study

| Strain | Genotype                                                                                                                                                                | Source/ reference                                  |
|--------|-------------------------------------------------------------------------------------------------------------------------------------------------------------------------|----------------------------------------------------|
| N2     | Ancestral                                                                                                                                                               |                                                    |
| EG6429 | oxSi36[unc-47::GFP unc-119(+)]IV; unc-41(e268)V                                                                                                                         | Jorgensen Lab<br>(Frøkjaer-Jensen et al.,<br>2008) |
| JK2739 | mcm-4(e1466) dpy-5(e61) I/hT2 [bli-4(e937) let-?(q782)<br>qIs48] (I;III)                                                                                                | CGC                                                |
| GCP21  | ItIs157 [pAC16;Ppie-1::Life-Act::GFP; unc-119 (+)]; ItIs37<br>[pAA64; Ppie-1::mCherry::his-58; unc-119 (+)] IV                                                          | Our Lab (Silva et al.,<br>2016)                    |
| GCP22  | ItIs157 [pAC16;Ppie-1::Life-Act::GFP; unc-119 (+)]; unc-<br>119(ed3)III; prtSi2[pAC71; Pnmy-2:: re-encoded nmy-<br>2::mCherry::StrepTagII::3'UTRnmy-2; cb-unc-119(+)]II | This study                                         |
| GCP179 | nmy-2(cp13[nmy-2::GFP + LoxP] I; ItIs44 [pAA173; Ppie-<br>1::mCherry::PH(PLC1delta1); unc-119 (+)]                                                                      | This study                                         |
| GCP401 | nmy-2 [prt38(S250A)]I; ItIs157 [pAC16;Ppie-1::Life-<br>Act::GFP; unc-119 (+)]; ItIs37 [pAA64; Ppie-<br>1::mCherry::his-58; unc-119 (+)] IV                              | This study                                         |
| GCP420 | nmy-2 [prt37(R718C)]I; ItIs157 [pAC16;Ppie-1::Life-<br>Act::GFP; unc-119 (+)]; ItIs37 [pAA64; Ppie-<br>1::mCherry::his-58; unc-119 (+)] IV                              | This study                                         |
| GCP513 | nmy-2 [prt100(R252A)]I/hT2 [bli-4(e937) let-?(q782)<br>qIs48] (I;III).                                                                                                  | This study                                         |
| GCP523 | unc-54[prt98(S239A)]I                                                                                                                                                   | This study                                         |
| GCP524 | unc-54[prt97(R710C)]I                                                                                                                                                   | This study                                         |
| GCP565 | unc-54[prt99(R241A)]I                                                                                                                                                   | This study                                         |

|        |                                                                                                                                                                                         |            |
|--------|-----------------------------------------------------------------------------------------------------------------------------------------------------------------------------------------|------------|
| GCP592 | nmy-2 [prt100(R252A)]I; ItIs157 [pAC16;Ppie-1::Life-Act::GFP; unc-119 (+)]; unc-119(ed3)III; prtSi2[pAC71; Pnmy-2:: re-encoded nmy-2::mCherry::StrepTagII::3'UTRnmy-2; cb-unc-119(+)]II | This study |
| GCP618 | nmy-2 [prt113(S251A)]I; ItIs157 [pAC16;Ppie-1::Life-Act::GFP; unc-119 (+)]; unc-119(ed3)III; prtSi2[pAC71; Pnmy-2::re-encoded nmy-2::mCherry::StrepTagII::3'UTRnmy-2; cb-unc-119(+)]II  | This study |
| GCP619 | unc-54[prt112(S240A)]I                                                                                                                                                                  | This study |
| GCP629 | nmy-2 [prt113(S251A)]I/hT2 [bli-4(e937) let-?(q782) qls48] (I;III)                                                                                                                      | This study |

**Table S2. List of CRISPR/Cas9 single guide RNAs (sgRNAs) and repair templates used in this study**

| Gene/Mutation       | Repair template*                                                                                                                                                      | Diagnosis PCR and restriction enzyme                                                                                                      | sgRNA sequence                                                                |
|---------------------|-----------------------------------------------------------------------------------------------------------------------------------------------------------------------|-------------------------------------------------------------------------------------------------------------------------------------------|-------------------------------------------------------------------------------|
| <i>nmy-2(S250A)</i> | aaccggatcatggccagcttgagga<br>acagcttttgcaagcaaattccatTctT<br>gaAgcAttTggaacagtaagacag<br>tgaagaacgataatGcTagCagattt<br>gtgagtgatcataacttttaaatgcacg<br>catcgtaaattttt | <u>Forward primer:</u><br>ACTCTGGCTTGTTCTGCGTT<br><u>Reverse primer:</u><br>GCACGCGAGATTTCTCCAG<br><u>Restriction enzyme:</u><br>NheI     | sgRNA#1<br>CAAGCAAATCCCAT<br>ACTCG<br><br>sgRNA#2<br>ATCCCACTACTCGAG<br>GCTTT |
| <i>nmy-2(S251A)</i> | aaccggatcatggccagcttgagga<br>acagcttttgcaagcaaattccatTctT<br>gaAgcAttTggaacagtaagacag<br>tgaagaacgataatAGCGCTagat<br>ttgtgagtgatcataacttttaaatgcac<br>gcatcgtaaattttt | <u>Forward primer:</u><br>ACTCTGGCTTGTTCTGCGTT<br><u>Reverse primer:</u><br>GCACGCGAGATTTCTCCAG<br><u>Restriction enzyme:</u><br>Eco47III | sgRNA#3<br>TGATCACTCACAAA<br>TCTAC                                            |
| <i>nmy-2(R252A)</i> | aaccggatcatggccagcttgagga<br>acagcttttgcaagcaaattccatTctT<br>gaAgcAttTggaacagtaagacag<br>tgaagaacgataattcTagCGCTttt<br>gtgagtgatcataacttttaaatgc                      | <u>Forward primer:</u><br>ACTCTGGCTTGTTCTGCGTT<br><u>Reverse primer:</u><br>GCACGCGAGATTTCTCCAG<br><u>Restriction enzyme:</u><br>Eco47III |                                                                               |

|                      |                                                                                                                                         |                                                                                                                                                    |                                                                                                                         |
|----------------------|-----------------------------------------------------------------------------------------------------------------------------------------|----------------------------------------------------------------------------------------------------------------------------------------------------|-------------------------------------------------------------------------------------------------------------------------|
| <i>nmy-2(R718C)</i>  | cacgaaaagaacatggagttctcaacgctcatctgttcttgatcaattGagatgcaacggagtgttAgaaggaattTGCatgatgTcgcaaggattccctacgcggtctcccggtccaagaattccgcaacgcta | <u>Forward primer:</u><br>TCATTTGTTCAACG<br>CCTCAA<br><u>Reverse primer:</u><br>cagcattgagcttggaagattcaat<br><u>Restriction enzyme:</u><br>NdeI    | sgRNA#1<br>CCGCGTAGGGAAT<br>CCTTGA<br><br>sgRNA#2<br>GAATTCGTATATGC<br>CGTCA<br><br>sgRNA#3<br>TTAAGATGCAACGG<br>AGTGT  |
| <i>unc-54(S239A)</i> | ccttcggaacgccaagactgtccgtaacaacaacGcGtcAcgCttTggaaagttcatccgtatccactcaacaagcaccgg                                                       | <u>Forward primer:</u><br>AAGACCACGAGAA<br>CCAGTCT<br><u>Reverse primer:</u><br>CGTACATGTTGGAT<br>GCCTTC<br><u>Restriction enzyme:</u><br>MluI     | sgRNA#1<br>ACAACAACCTCTTCC<br>CGTTT<br><br>sgRNA#2<br>CGGATGAACTTTCC<br>GAAAC<br><br>sgRNA#3<br>ACGGATGAACTTTC<br>CGAAA |
| <i>unc-54(S240A)</i> | ccttcggaacgccaagactgtccgtaacaacaacAGCGcTcgtttcggaaagttcatccgtatccactcaacaa                                                              | <u>Forward primer:</u><br>AAGACCACGAGAA<br>CCAGTCT<br><u>Reverse primer:</u><br>CGTACATGTTGGAT<br>GCCTTC<br><u>Restriction enzyme:</u><br>Eco47III | sgRNA#3<br>ACGGATGAACTTTC<br>CGAAA                                                                                      |
| <i>unc-54(R241A)</i> | tcggaacgccaagactgtccgtaacaacaactcaAGcGCttTggaaagttcatccgtatccactcaacaagcaccgg                                                           | <u>Forward primer:</u><br>AAGACCACGAGAA<br>CCAGTCT<br><u>Reverse primer:</u><br>CGTACATGTTGGAT<br>GCCTTC<br><u>Restriction enzyme:</u><br>Eco47III |                                                                                                                         |



|                             |                                                                                                                             |                                                                                                                                                                    |                                                                                                                                     |
|-----------------------------|-----------------------------------------------------------------------------------------------------------------------------|--------------------------------------------------------------------------------------------------------------------------------------------------------------------|-------------------------------------------------------------------------------------------------------------------------------------|
| <p><i>unc-54(R710C)</i></p> | <p>cttggttctcaaccagcttacctgcaac<br/>ggagtCCtCgaGgg<u>CatATg</u>Tatt<br/>tgcCgTaaAggattccccaacagaa<br/>ccctcatccagactcgt</p> | <p><u>Forward primer:</u><br/>CGAGAAGAACAAG<br/>GACCCCC</p> <p><u>Reverse primer:</u><br/>TGCGAAGCTTCTCC<br/>TCCTTG</p> <p><u>Restriction enzyme:</u><br/>NdeI</p> | <p>sgRNA#1<br/>GAATCAGAATTTGC<br/>AGAAA</p> <p>sgRNA#2<br/>GGAATCAGAATTTG<br/>CAGAA</p> <p>sgRNA#3<br/>CCTGCAACGGAGT<br/>GTTGGA</p> |
|-----------------------------|-----------------------------------------------------------------------------------------------------------------------------|--------------------------------------------------------------------------------------------------------------------------------------------------------------------|-------------------------------------------------------------------------------------------------------------------------------------|

\*Bases in uppercase indicate silent mutations introduced to avoid repair template recognition by Cas9 and/or to introduce a restriction site (underlined bases) for diagnostic PCR of genomic edits.

**Table S3. List of dsRNAs used in this study**

| Name        | Gene target                                                                          | Forward primer                                  | Reverse primer                                 | RNAi                             |
|-------------|--------------------------------------------------------------------------------------|-------------------------------------------------|------------------------------------------------|----------------------------------|
| nmy-2_RNA#1 | nmy-2<br>(does not target re-<br>encoded nmy-<br>2:mCherry <sup>sen</sup> )          | GGCCCGATAT<br>CATGAACAAC<br>GAGCTTGAAA<br>G     | GGCACGATAT<br>CAGCCTCCTG<br>GATAGCC            | feeding                          |
| nmy-2_RNA#2 | re-encoded nmy-<br>2:mCherry <sup>sen</sup><br>(does not target<br>endogenous nmy-2) | GGCCCGATAT<br>CATGAATAAT<br>GAACTCGAGT<br>CAATC | GGCCCGATAT<br>CACGTTCTTG<br>AATGGCC            | feeding                          |
| nmy-2_RNA#3 | nmy-2 and re-<br>encoded nmy-<br>2:mCherry <sup>sen</sup>                            | CCCAAGATAT<br>CAATTGAATC<br>TCGGTTGAAG<br>GAA   | CCCCCGATAT<br>CGACTGCATT<br>TCACGCATCTT<br>ATG | feeding                          |
| myo-3       | myo-3                                                                                | -----                                           | -----                                          | feeding<br>(Ahringer<br>library) |
| unc-54      | unc-54                                                                               | -----                                           | -----                                          | feeding<br>(Ahringer<br>library) |

**Table S4. Primers used in this study**

| Sequence                                                                                                 | Target (gene/plasmid) | Purpose                                                                                                                              |
|----------------------------------------------------------------------------------------------------------|-----------------------|--------------------------------------------------------------------------------------------------------------------------------------|
| <b>Forward:</b><br>GAGCTCACCTAGCTAGAAGTCTT<br>T<br><b>Reverse:</b><br>CGAGATGATGTCATTATTACCGC<br>TGG     | nmy-2 (gDNA)          | pCFJ151-Pnmy2 5.2kb:: re-<br>encoded<br>nmy2::mCherryStrepTagII::3'n<br>my2 1.2kb (pAC71)<br><br>nmy-2 promoter fragment             |
| <b>Forward:</b><br>CCAGCGGTAATAATGACATCATC<br>TCG<br><b>Reverse:</b><br>CCCTTTGAGACCATCTGCAGGTT<br>GC    | nmy-2 (pAC65)         | pCFJ151-Pnmy2 5.2kb::re-<br>encoded<br>nmy2::mCherryStrepTagII::3'n<br>my2 1.2kb (pAC71)<br><br>nmy-2 open reading frame<br>fragment |
| <b>Forward:</b><br>CCCTTTGAGACCATCTGCAGGTT<br>GCG<br><b>Reverse:</b><br>CCGTACGTCTCGAGTCTAGAGGA<br>ATATC | nmy-2 (pAC65)         | pCFJ151-Pnmy2 5.2kb::re-<br>encoded<br>nmy2::mCherryStrepTagII::3'n<br>my2 1.2kb (pAC71)<br><br>nmy-2 3'UTR fragment                 |
| <b>Forward:</b><br>CGCAACCTGCAGATGGTCTCAA<br>GGG<br><b>Reverse:</b><br>CCCTTTGAGACCATCTGCAGGTT<br>GCG    | mCherry (pDC122)      | pCFJ151-Pnmy2 5.2kb:: re-<br>encoded<br>nmy2::mCherryStrepTagII::3'n<br>my2 1.2kb (pAC71)<br><br>mCherry fragment                    |
| <b>Forward:</b><br>AAGCTTGTCGAGAAGTACTAGAG<br>GATCATAATC<br><b>Reverse:</b><br>GCCGCTACCAGAGCCATGG       | pACEbac1              | pACEbac1-6xHis::nmy2 (1-<br>854) (pAC429)<br><br>backbone+6xHis tag fragment                                                         |

|                                                                                                                                                  |                |                                                                                                                |
|--------------------------------------------------------------------------------------------------------------------------------------------------|----------------|----------------------------------------------------------------------------------------------------------------|
| <b>Forward:</b><br>ACCATGGCTCTGGTAGCGGCACAT<br>CATCTCGACAAAAAGATGATGAG<br><b>Reverse:</b><br>TAGTACTTCTCGACAAGCTTTTGTAGT<br>TGCGAACTGAGTCGCGGTCT | nmy-2 (cDNA)   | pACEbac1-6xHis::nmy2 (1-854) (pAC429)<br><br>nmy-2 ORF fragment                                                |
| <b>Forward:</b><br>ACCATGGCTCTGGTAGCGGCACAT<br>CATCTCGACAAAAAGATGATGAG<br><b>Reverse:</b><br>TTAATCTTCTTCGAGCTGACGAATT<br>T                      | nmy-2 (cDNA)   | pACEbac1-6xHis::nmy2 (1-1354) (pAC514)<br><br>nmy-2 1-1354 ORF fragment                                        |
| <b>Forward:</b><br>AAGCTTGTCGAGAAGTACTAGAGG<br>ATCATAATC<br><b>Reverse:</b><br>GCCGCTACCAGAGCCTTTTTTC                                            | pACEbac1       | pACEbac1-StrepTagII::mlc-4 (pAC437)<br>pACEbac1-StrepTagII::mlc-5 (pAC438)<br><br>backbone+StrepTagII fragment |
| <b>Forward:</b><br>AAAAAGGCTCTGGTAGCGGCGCC<br>TCCCGCAAACCGTAAAC<br><b>Reverse:</b><br>TAGTACTTCTCGACAAGCTTTTAAAG<br>CCTCATCCTTGTCCTTGG           | mlc-4 (cDNA)   | pACEbac1-StrepTagII::mlc-4 (pAC437)<br><br>mlc-4 ORF fragment                                                  |
| <b>Forward:</b><br>AAAAAGGCTCTGGTAGCGGCGA<br>CGATTTGGCTGATTGTCGTG<br><b>Reverse:</b><br>AGTACTTCTCGACAAGCTTTTGTAG<br>GAGTTCATGACAGCGCG           | mlc-5 (cDNA)   | pACEbac1-StrepTagII::mlc-5 (pAC438)<br><br>mlc-5 ORF fragment                                                  |
| <b>Forward:</b><br>AAAAAGGCTCTGGTAGCGGCGAG<br>CAGGATGAGCTGCGTG<br><b>Reverse:</b><br>TAGTACTTCTCGACAAGCTTACTA<br>TTGATAGATTGTGGAAGAG             | let-502 (cDNA) | pACEbac1-StrepTagII::let-502 (pAC522)<br><br>let-502 full length ORF fragment                                  |

|                                                                                                                                           |                                                                                             |                                                                                                           |
|-------------------------------------------------------------------------------------------------------------------------------------------|---------------------------------------------------------------------------------------------|-----------------------------------------------------------------------------------------------------------|
| <b>Forward:</b><br>TAGTAAGCTTGTGCGAGAAGTAC<br><b>Reverse:</b><br>TTCGAATTCTCGGTTTTTC                                                      | pACEbac1-<br>StrepTagII::LET-502<br>(pAC522)                                                | pACEbac1-StrepTagII::let-502<br>(1-469)(pAC527)                                                           |
| <b>Forward:</b><br>GACAGTGAAGAACGATAATGCCA<br>GTAGATTTGGAAAGTTC<br><b>Reverse:</b><br>GAACTTTCCAAATCTACTGGCATT<br>ATCGTTCTTCACTGTC        | pACEbac1-6xhis::NMY-2<br>(1-854) (pAC429)<br><br>pACEbac1-6xHis::NMY-2<br>(1-1354) (pAC514) | pACEbac1-6xHis::nmy-2<br>(S250A) (1-854) (pAC451)<br><br>pACEbac1-6xHis::nmy2<br>(S250A)(1-1354) (pAC515) |
| <b>Forward:</b><br>CAGTGAAGAACGATAATTCCGCT<br>AGATTTGGAAAGTTCATTC<br><b>Reverse:</b><br>GAATGAACTTTCCAAATCTAGCG<br>GAATTATCGTTCTTCACTG    | pACEbac1-6xHis::NMY-2<br>(1-854) (pAC429)<br><br>pACEbac1-6xHis::NMY-2<br>(1-1354) (pAC514) | pACEbac1-6xHis::nmy2<br>(S251A)(1-854) (pAC453)<br><br>pACEbac1-6xHis::nmy2<br>(S251A)(1-1354) (pAC516)   |
| <b>Forward:</b><br>GTGAAGAACGATAATTCCAGTGC<br>ATTTGGAAAGTTCATTCGCG<br><b>Reverse:</b><br>CGCGAATGAACTTTCCAAATGCA<br>CTGGAATTATCGTTCTTCCAC | pACEbac1-6xHis::NMY-2<br>(1-854) (pAC429)<br><br>pACEbac1-6xHis::NMY-2<br>(1-1354) (pAC514) | pACEbac1-6xHis::nmy2<br>(R252A)(1-854) (pAC452)<br><br>pACEbac1-6xHis::nmy2<br>(R252A)(1-1354) (pAC517)   |
| <b>Forward:</b><br>CGGAGTGTTGGAAGGAATTTGTA<br>TATGCCGTCAAGGATTC<br><b>Reverse:</b><br>GAATCCTTGACGGCATATACAAA<br>TTCCTTCCAACACTCCG        | pACEbac1-6xHis::NMY-2<br>(1-854) (pAC429)                                                   | pACEbac1-6xHis::nmy2<br>(R781C)(1-854) (pAC476)                                                           |

**Table S5. Plasmids used in this study**

| Plasmid                                                           | Source     | Reference          | Use                                                                 |
|-------------------------------------------------------------------|------------|--------------------|---------------------------------------------------------------------|
| Peft-3::Cas9 + Empty sgRNA                                        | Addgene    | RRID:Addgene_47549 | Expression of CAS-9 and guide RNAs                                  |
| pCFJ151                                                           | Addgene    | RRID:Addgene_19330 | Generation of MosSCI strains                                        |
| pCFJ601                                                           | Addgene    | RRID:Addgene_34874 | MosSCI strains co-injection markers                                 |
| pCFJ90                                                            | Addgene    | RRID:Addgene_19327 | MosSCI strains co-injection markers                                 |
| pCFJ104                                                           | Addgene    | RRID:Addgene_19328 | MosSCI strains co-injection markers                                 |
| pGH8                                                              | Addgene    | RRID:Addgene_19359 | MosSCI strains co-injection markers                                 |
| L4440                                                             | Addgene    | RRID:Addgene_1654  | Plasmid for RNAi by feeding                                         |
| pCFJ151-Pnmy2 5.2kb::nmy2 reenc::mCherryStrepTagII::3'n my2 1.2kb | This study | pAC71              | Plasmid for generation of NMY-2::mCherry <sup>sen</sup> (GCP22)     |
| pACEBac1-6xHis::nmy-2(1-874)_WT                                   | This study | pAC429             | Plasmid for Baculovirus expression 6xHis NMY-2 <sub>S1</sub>        |
| pACEBac1-6xHis::nmy-2(1-874)_S250A                                | This study | pAC451             | Plasmid for Baculovirus expression 6xHis NMY-2(S250A) <sub>S1</sub> |
| pACEBac1-6xHis::nmy-2(1-874)_S251A                                | This study | pAC453             | Plasmid for Baculovirus expression 6xHis NMY-2(S251A) <sub>S1</sub> |

|                                     |            |        |                                                                      |
|-------------------------------------|------------|--------|----------------------------------------------------------------------|
| pACEBac1-6xHis::nmy-2(1-874)_R252A  | This study | pAC452 | Plasmid for Baculovirus expression 6xHis NMY-2(R252A) <sub>S1</sub>  |
| pACEBac1-6xHis::nmy-2(1-1354)_WT    | This study | pAC514 | Plasmid for Baculovirus expression 6xHis NMY-2 <sub>HMM</sub>        |
| pACEBac1-6xHis::nmy-2(1-1354)_S250A | This study | pAC515 | Plasmid for Baculovirus expression 6xHis NMY-2(S250A) <sub>HMM</sub> |
| pACEBac1-6xHis::nmy-2(1-1354)_S251A | This study | pAC516 | Plasmid for Baculovirus expression 6xHis NMY-2(S251A) <sub>HMM</sub> |
| pACEBac1-6xHis::nmy-2(1-1354)_R252A | This study | pAC517 | Plasmid for Baculovirus expression 6xHis NMY-2(R252A) <sub>HMM</sub> |
| pACEBac1-StrepTagII::mlc-4          | This study | pAC437 | Plasmid for Baculovirus expression StrepTagII MLC-4                  |
| pACEBac1-StrepTagII::mlc-5          | This study | pAC438 | Plasmid for Baculovirus expression StrepTagII MLC-5                  |
| pACEBac1-StrepTagII::Let-502(1-469) | This study | pAC527 | Plasmid for Baculovirus expression StrepTagII LET-502(1-469)         |

## Supplemental References

**Frøkjær-Jensen, C., Davis, M. W., Hopkins, C. E., Newman, B. J., Thummel, J. M., Olesen, S.-P., Grunnet, M. and Jorgensen, E. M.** (2008). Single-copy insertion of transgenes in *Caenorhabditis elegans*. *Nat. Genet.* **40**, 1375–1383. doi:10.1038/ng.248

**Silva, A. M., Osório, D. S., Pereira, A. J., Maiato, H., Pinto, I. M., Rubinstein, B., Gassmann, R., Telley, I. A. and Carvalho, A. X.** (2016). Robust gap repair in the contractile ring ensures timely completion of cytokinesis. *J. Cell Biol.* **215**, 789-799. doi:10.1083/jcb.201605080
